# Supplementary material
Source: PubMed Central journal article supplement (PMC4794066)
Supplement: aubo024880.ww_default.pdf [file aubo024880.ww_default.pdf]

## Web appendix: Supplementary material

### SUPPLEMENTARY TABLES

**Web table 1:** Factors associated with kidney allograft loss in the multivariate analysis with Cold ischemia time as a continuous variable.

**Web Table 2:** Factors associated with kidney allograft loss integrating preimplantation biopsy results.

**Web Table 3:** Determinants of kidney allograft outcome: multivariate model excluding 393 living donors.

**Web Table 4:** Factors associated with kidney graft loss using non a priori donor parameters instead of ECD criteria.

**Web Table 5:** Factors associated with kidney allograft loss stratified by centre.

**Web Table 6:** Baseline characteristics of donors and recipients in the external validation cohort and in the principal cohort.

**Web Table 7:** Factors associated with kidney allograft loss in the external validation cohort.

### SUPPLEMENTARY FIGURES

**Web Figure 1:** Distribution of donor age in the development cohort.

**Web Figure 2:** Kidney allograft preimplantation biopsy phenotypes, according to SCD or ECD status and the presence of donor specific anti-HLA antibody on the day of transplantation.

**Web Figure 3:** Cumulative incidence plots of graft loss comparing ECD and SCD and those of deaths (the competing event for graft loss) comparing ECD and SCD and cumulative incidence graft loss comparing ECD/DSA+ and SCD/DSA+ and those of death comparing ECD/DSA+ and SCD/DSA+.

**Web Figure 4:** Kidney allograft function at one year post-transplantation, according to SCD or ECD status and the presence of donor specific anti-HLA antibody on the day of transplantation.

**Web Figure 5:** Kidney-allograft biopsy phenotypes at one year post-transplantation, according to SCD or ECD status and donor specific anti-HLA antibody on the day of transplantation.

**Web Figure 6:** Kaplan-Meier curves for kidney allograft survival by donor type (SCD, Panel A; ECD, Panel B) and anti-HLA DSA MFI level on the time of transplantation.

**Web Figure 7:** Kaplan-Meier curves for kidney allograft survival by HLA class of immunodominant DSA.

**Web Figure 8:** Kaplan-Meier curves for kidney allograft survival by KDRI (Panel A) and the presence of DSA on the day of transplantation (Panel B).

**Web Figure 9:** Kidney allograft survival according to ECD and DSA status in the propensity score-matched cohort.

**Web Figure 10:** Kaplan-Meier curves for kidney allograft survival in the external validation cohort by donor type and anti-HLA antibody sensitization (Panel reactive antibodies, PRA).

## **SUPPLEMENTARY METHODS**

### **Data collection procedures**

All data from Necker and Toulouse Hospitals regarding donor and recipient were extracted from the DIVAT clinical prospective cohort (Official website: [www.divat.fr](http://www.divat.fr)). Data from Saint Louis and Foch hospitals were excerpted from the French national agency database CRISTAL (Official website: <https://www.sipg.sante.fr/portail/>). DIVAT and CRISTAL databases network have been approved by the National French Commission for bioinformatics data and patients liberty: DIVAT: CNIL, Registration number: 1016618, validated 8<sup>th</sup> June 2004 and CRISTAL: CNIL, Registration number: 363505, validated 3<sup>th</sup> April 1996. Codes were used to ensure the strict donor and recipient anonymity and blind assay. Informed consent is obtained from the participants at time of transplantation. The data are computerized in real time as well as at each transplant anniversary and are submitted for an annual audit.

### **Independent validation cohort**

This external validation set is composed of the 4128 consecutive kidney recipients transplanted in Lyon, Montpellier, Nancy, and Nantes hospitals, France. Kidney transplantations were performed between 1 January, 2002 and 31 December, 2011. Similar immunological rules for kidney transplantation applied, with all transplantations being ABO compatible with a negative current IgG T-cell and B-cell complement-dependent cytotoxicity cross-matching required for all patients. The quantification of day-0 anti-HLA sensitisation was determined in the validation cohort using cytotoxic panel-reactive antibodies (PRAs) for the patients transplanted before July 2009 and calculated PRAs (cPRAs) for the kidney recipient patients transplanted after July 2009. A PRA value >5% was defined as the threshold for defining sensitised patients according to the French national agency for organ procurement recommendations (Agence de la biomédecine (<http://www.sipg.sante.fr/portail/>)).

## **Post-transplantation induction protocols and maintenance of immunosuppressive therapy**

Patients received induction therapy consisting of rabbit antithymocytes globulin (1.5 mg per kilogram per day, for 10 days) or basiliximab (20 mg at day 0 and day 4) immediately after transplantation. Subsequent maintenance immunosuppressive therapy consisted of prednisone, mycophenolate mofetil (1000 mg twice daily), tacrolimus administered to maintain a target blood level of 8 to 10 ng per millilitre for the first 3 months and 6 to 8 ng per milliliter after 3 months or cyclosporine administered to maintain a target blood level of 800 to 1200 ng per millilitre for the first 3 months and 600 to 800 ng per milliliter after 3 months.

## **Kidney allograft lesions: Banff scoring system (15)**

Chronicity scores reflecting donor-derived lesions and baseline transplant damage were measured in preimplantation biopsies according to the percentage of sclerotic glomeruli, interstitial fibrosis/tubular atrophy (IF/TA score), arteriolar hyaline thickening (ah score) and vascular fibrous intimal thickening arteriosclerosis (cv score). In addition, the following histological factors were assessed and scored in all post-transplant kidney allograft biopsies: glomerulitis (g score), tubulitis (t score), mononuclear cell interstitial inflammation (i score), intimal arteritis (v score), peritubular capillaritis (ptc score), and allograft glomerulopathy (cg score). C4d staining was performed in the post-transplant biopsies by immunochemistry on paraffin sections using polyclonal human anti-C4d antibodies (Biomedica Gruppe, Austria).

## **Propensity score**

To test whether older recipient age might have affected allograft outcome and the associations identified in the primary analyses, a propensity score was used, which estimates the a posteriori probability of assigning an ECD kidney conditional on baseline parameters, such as recipient age, recipient gender, recipient cause of end-stage renal disease, recipient time on dialysis, presence of recipient circulating anti-HLA DSA on the day of transplantation, donor diabetes, living donor, retransplantation, cold ischemia time, and

HLA A/B/DR mismatch. The covariates included in the ECD definition were excluded (donor age, history of hypertension, cardio-vascular death and creatinine levels). Using propensity score matching, each ECD individual was matched with an SCD individual with the same a posteriori probability of receiving an ECD organ (caliper width: 0.2). In this manner, the indication bias for ECD therapy was reduced. The matched sample was composed of 540 ECD recipients matched with 540 SCD recipients. The mean recipient age was  $55\pm 10$  years in the ECD group and  $54\pm 9$  years in the SCD group.

### **KDRI score**

The KDRI score included the following:

- Donor age,
- Donor height
- Donor weight
- Donor history of hypertension
- Donor history of diabetes
- Donor cause of death (cerebral stroke)
- Donor serum creatinine at donation
- Donor hepatitis C virus (HCV) status,
- Donation after circulatory death (DCD) status.

The KDRI score estimates the risk of function loss of a kidney-graft transplanted to a reference donor. This donor is defined as a person 40 years old, non afro-american, 170 cm tall, weighing 80 kg, with a creatinine level of 1 mg/dL, negative history of hypertension, diabetes and hepatitis C. Ethnicity was not used in our study because it is not available according to French national bioethics rules. The interquartile range of 1.82 to identify the 25 % of patients with the highest KDRI was used (Supplementary Figure 8).

**Web Table 1: Factors associated with kidney-allograft loss in the multivariate analysis with Cold ischemia time as continuous variable.**

|                                                  |              | Number of patients | Number of events | HR    | 95% CI           | P                 |
|--------------------------------------------------|--------------|--------------------|------------------|-------|------------------|-------------------|
| <b>ECD</b>                                       | <b>No</b>    | 1835               | 187              | 1     | -                |                   |
|                                                  | <b>Yes</b>   | 855                | 138              | 1.884 | (1.506 to 2.571) | <b>&lt;0.0001</b> |
| <b>Cold ischemia time (per 1-hour increment)</b> |              | 2690               | 325              | 1.013 | (1.000 to 1.027) | <b>0.04625</b>    |
| <b>Graft rank</b>                                | <b>1</b>     | 2278               | 241              | 1     | -                |                   |
|                                                  | <b>&gt;1</b> | 412                | 84               | 1.574 | (1.190 to 2.080) | <b>0.0015</b>     |
| <b>No. of HLA A/B/DR mismatches</b>              |              | 2690               | 325              | 1.095 | (1.013 to 1.184) | <b>0.0221</b>     |
| <b>Anti-HLA DSA on day 0</b>                     | <b>No</b>    | 2364               | 241              | 1     | -                |                   |
|                                                  | <b>Yes</b>   | 326                | 84               | 2.997 | (2.272 to 2.357) | <b>&lt;0.0001</b> |

Abbreviations: ECD, Expanded criteria donor; DSA, Donor specific anti-HLA antibody; HLA, human leucocyte antigen

**Web Table 2A: Factors associated with kidney allograft loss integrating preimplantation biopsy results in univariate analysis.**

|                                                  |                                                  |                             | Number of patients | Number of events | HR               | 95% CI           | P                 |
|--------------------------------------------------|--------------------------------------------------|-----------------------------|--------------------|------------------|------------------|------------------|-------------------|
| <b>Baseline recipients characteristics</b>       | <b>Age</b> (per 1-yr increment)                  |                             | 1011               | 108              | 1.009            | (0.994 to 1.024) | 0.2184            |
|                                                  | <b>Gender</b>                                    | <b>Female</b>               | 407                | 46               | 1                | -                |                   |
|                                                  |                                                  | <b>Male</b>                 | 604                | 62               | 0.868            | (0.593 to 2.271) | 0.4675            |
| <b>Baseline donor characteristics</b>            | <b>Age</b> (per 1-yr increment)                  |                             | 1011               | 108              | 1.018            | (1.006 to 1.031) | <b>0.0046</b>     |
|                                                  | <b>Gender</b>                                    | <b>Female</b>               | 451                | 62               | 1                | -                |                   |
|                                                  |                                                  | <b>Male</b>                 | 560                | 46               | 0.584            | (0.399 to 0.855) | <b>0.0057</b>     |
|                                                  | <b>Donor Type</b>                                | <b>Living related</b>       | 44                 | 2                | 1                | -                |                   |
|                                                  |                                                  | <b>Death of CV disease</b>  | 536                | 68               | 2.441            | (0.598 to 9.967) |                   |
|                                                  |                                                  | <b>Other cause of death</b> | 431                | 38               | 1.632            | (0.394 to 6.769) | <b>0.0803</b>     |
|                                                  | <b>Deceased donor</b>                            | <b>No</b>                   | 44                 | 2                | 1                | -                |                   |
|                                                  |                                                  | <b>Yes</b>                  | 967                | 106              | 2.073            | (0.511 to 8.400) | 0.3073            |
|                                                  | <b>Hypertension</b>                              | <b>No</b>                   | 690                | 63               | 1                | -                |                   |
|                                                  |                                                  | <b>Yes</b>                  | 290                | 42               | 1.804            | (1.220 to 2.668) | <b>0.0031</b>     |
|                                                  | <b>Diabetes mellitus</b>                         | <b>No</b>                   | 856                | 89               | 1                | -                |                   |
|                                                  |                                                  | <b>Yes</b>                  | 63                 | 8                | 1.357            | (0.658 to 2.799) | 0.4080            |
|                                                  | <b>Creatinine</b> (mg/dL)                        | <b>&lt; 1.5</b>             | 902                | 100              | 1                | -                |                   |
| <b>≥ 1.5</b>                                     |                                                  | 98                          | 8                  | 0.722            | (0.351 to 1.483) | 0.3747           |                   |
| <b>ECD</b>                                       | <b>No</b>                                        | 392                         | 55                 | 1                | -                |                  |                   |
|                                                  | <b>Yes</b>                                       | 619                         | 53                 | 1.856            | (1.272 to 2.707) | <b>0.0013</b>    |                   |
| <b>Transplant characteristics</b>                | <b>Graft Rank</b>                                | <b>1</b>                    | 820                | 74               | 1                | -                |                   |
|                                                  |                                                  | <b>&gt; 1</b>               | 191                | 34               | 2.007            | (1.337 to 3.012) | <b>0.0008</b>     |
|                                                  | <b>Cold ischemia time</b> (hours)                | <b>&lt; 12</b>              | 143                | 7                | 1                | -                |                   |
|                                                  |                                                  | <b>12-24</b>                | 633                | 73               | 2.408            | (1.108 to 5.231) |                   |
|                                                  | <b>≥ 24</b>                                      | 235                         | 28                 | 2.587            | (1.130 to 5.023) | 0.0676           |                   |
| <b>Histological factors at day 0<sup>a</sup></b> | <b>Percentage of glomerulosclerosis</b>          | <b>0</b>                    | 415                | 33               | 1                | -                |                   |
|                                                  |                                                  | <b>1-10%</b>                | 222                | 23               | 1.478            | (0.867 to 2.518) |                   |
|                                                  |                                                  | <b>11-20%</b>               | 181                | 26               | 1.900            | (1.136 to 3.177) |                   |
|                                                  |                                                  | <b>&gt; 20%</b>             | 145                | 20               | 1.909            | (1.095 to 3.328) | <b>0.0468</b>     |
|                                                  | <b>Interstitial fibrosis and tubular atrophy</b> | <b>Low score: 0 or 1</b>    | 792                | 84               | 1                | -                |                   |
|                                                  |                                                  | <b>High score: ≥ 2</b>      | 21                 | 4                | 2.267            | (0.794 to 5.913) | 0.1311            |
|                                                  | <b>Arteriosclerosis</b>                          | <b>Low score: 0 or 1</b>    | 533                | 55               | 1                | -                |                   |
|                                                  |                                                  | <b>High score: ≥ 2</b>      | 228                | 26               | 1.169            | (0.733 to 1.865) | 0.5112            |
|                                                  | <b>Arteriolar hyalinosis</b>                     | <b>Low score: 0 or 1</b>    | 658                | 67               | 1                | -                |                   |
|                                                  |                                                  | <b>High score: ≥ 2</b>      | 159                | 19               | 1.341            | (0.805 to 2.236) | 0.2601            |
| <b>Immunologic factors</b>                       | <b>No. of HLA A/B/DR mismatches</b>              |                             | 1010               | 108              | 1.062            | (0.931 to 1.212) | 0.3694            |
|                                                  | <b>Anti-HLA DSA on Day 0</b>                     | <b>No</b>                   | 836                | 68               | 1                | -                |                   |
|                                                  |                                                  | <b>Yes</b>                  | 175                | 40               | 3.656            | (2.468 to 5.415) | <b>&lt;0.0001</b> |

Abbreviations: CI, Confidence interval; HR, Hazard ratio; CV, Cardio-vascular; ECD, Expanded criteria donor; DSA, Donor-specific anti-HLA antibodies; HLA, human leucocyte antigen

<sup>a</sup>Banff scores range from 0 to 3, with higher scores indicating more severe abnormalities

**Web Table 2B: Factors associated with kidney-allograft loss integrating preimplantation biopsy results in multivariate analysis.**

|                              |            | <b>Number of patients</b> | <b>Number of events</b> | <b>HR</b> | <b>95% CI</b>    | <b>P</b>          |
|------------------------------|------------|---------------------------|-------------------------|-----------|------------------|-------------------|
| <b>ECD</b>                   | <b>No</b>  | 392                       | 55                      | 1         | -                |                   |
|                              | <b>Yes</b> | 619                       | 53                      | 1.944     | (1.332 to 2.838) | <b>0.0006</b>     |
| <b>Anti-HLA DSA on day 0</b> | <b>No</b>  | 836                       | 68                      | 1         | -                |                   |
|                              | <b>Yes</b> | 175                       | 40                      | 3.777     | (2.548 to 5.599) | <b>&lt;0.0001</b> |

Final multivariate Cox model obtained by entering risk factors from the univariate model reaching  $p \leq 0.10$  as the threshold in a single multivariate proportional hazards model. The final multivariate model is adjusted on the following parameters: Donor gender, ECD, graft rank, cold ischemia time, the number of HLA A/B/DR mismatch, circulating donor-specific antibodies and the percentage of glomerulosclerosis in preimplantation kidney allograft biopsy.

Abbreviations: CI, Confidence interval; HR, Hazard ratio; ECD, Expanded criteria donor.; HLA, human leucocyte antigen



**Web Table 3: Determinants of kidney allograft outcome: multivariate model excluding 393 living donors**

|                              |             | Number of patients | Number of events | HR    | 95% CI           | P                 |
|------------------------------|-------------|--------------------|------------------|-------|------------------|-------------------|
| ECD                          | No          | 1454               | 162              | 1     | -                |                   |
|                              | Yes         | 855                | 138              | 1.856 | (1.473 to 2.337) | <b>&lt;0.0001</b> |
| Cold ischemia time           | <12 hours   | 294                | 19               | 1     | -                |                   |
|                              | 12-24 hours | 1510               | 198              | 1.670 | (1.039 to 2.684) |                   |
|                              | ≥24 hours   | 505                | 83               | 1.964 | (1.182 to 3.263) | <b>0.032</b>      |
| Graft rank                   | 1           | 1933               | 217              | 1     | -                |                   |
|                              | >1          | 376                | 83               | 1.620 | (1.216 to 2.159) | <b>0.001</b>      |
| No. of HLA A/B/DR mismatches |             | 2309               | 300              | 1.084 | (0.999 to 1.176) | <b>0.053</b>      |
| Anti-HLA DSA on day 0        | No          | 2024               | 221              | 1     | -                |                   |
|                              | Yes         | 285                | 79               | 2.880 | (2.158 to 3.845) | <b>&lt;0.0001</b> |

Abbreviations: ECD, Expanded criteria donor; DSA, Donor specific anti-HLA antibody; HLA, human leucocyte antigen

**Web Table 4: Factors associated with kidney graft loss using non a priori donor parameters instead of ECD criteria in multivariate analysis.**

|                                |             | Number of patients | Number of events | HR    | 95% CI           | P                 |
|--------------------------------|-------------|--------------------|------------------|-------|------------------|-------------------|
| Donor age (per 1-yr increment) |             | 2690               | 325              | 1.016 | (1.009 to 1.024) | <b>&lt;0.0001</b> |
| Cold ischemia time             | < 12 hours  | 670                | 44               | 1     | -                |                   |
|                                | 12-24 hours | 1514               | 198              | 1.638 | (1.179 to 2.277) |                   |
|                                | ≥ 24 hours  | 506                | 83               | 1.872 | (1.289 to 2.718) | <b>0.0033</b>     |
| Graft Rank                     | 1           | 2278               | 241              | 1     | -                |                   |
|                                | > 1         | 412                | 84               | 1.544 | (1.168 to 2.042) | <b>0.0023</b>     |
| No. of HLA A/B/DR mismatches   |             | 2690               | 325              | 1.103 | (1.020 to 1.193) | <b>0.0138</b>     |
| Anti-HLA DSA on day 0          | No          | 2364               | 241              | 1     | -                |                   |
|                                | Yes         | 326                | 84               | 2.976 | (2.254 to 3.928) | <b>&lt;0.0001</b> |

Final multivariate Cox model obtained by entering risk factors from the univariate model reaching  $p \leq 0.10$  as the threshold in a single multivariate proportional hazards model. The final multivariate model is adjusted on the following parameters: Deceased donor, Donor diabetes, Donor's age, graft rank, cold ischemia time, the number of HLA A/B/DR mismatch and circulating donor-specific antibodies.

Abbreviations: CI, Confidence interval; HR, Hazard ratio; ECD, Expanded criteria donor; HLA, human leucocyte antigen

**Web Table 5A: Factors associated with kidney allograft loss stratified by centre in univariate analysis.**

|                                             |                                     |                             | Number of | Number of | HR               | 95% CI            | P                 |                   |
|---------------------------------------------|-------------------------------------|-----------------------------|-----------|-----------|------------------|-------------------|-------------------|-------------------|
|                                             |                                     |                             | patients  | events    |                  |                   |                   |                   |
| <b>Baseline recipients characteristics</b>  | <b>Age (per 1-yr increment)</b>     |                             | 2763      | 333       | 1.000            | (0.992 to 1.008)  | 0.9613            |                   |
|                                             | <b>Gender</b>                       | <b>Female</b>               | 1120      | 131       | 1                | -                 |                   |                   |
|                                             |                                     | <b>Male</b>                 | 1643      | 202       | 1.048            | (0.841 to 1.306)  | 0.6761            |                   |
| <b>Baseline donor characteristics</b>       | <b>Age (per 1-yr increment)</b>     |                             | 2763      | 333       | 1.016            | (1.009 to 1.024)  | <b>&lt;0.0001</b> |                   |
|                                             | <b>Gender</b>                       | <b>Female</b>               | 1254      | 163       | 1                | -                 |                   |                   |
|                                             |                                     | <b>Male</b>                 | 1509      | 170       | 0.854            | (0.689 to 1.059)  | 0.1515            |                   |
|                                             | <b>Donor Type</b>                   | <b>Living related</b>       |           | 393       | 25               | 1                 | -                 |                   |
|                                             |                                     | <b>Death of CV disease</b>  |           | 1323      | 184              | 2.066             | (1.358 to 3.143)  |                   |
|                                             |                                     | <b>Other cause of death</b> |           | 1047      | 124              | 1.651             | (1.072 to 2.543)  | <b>0.0015</b>     |
|                                             | <b>Deceased donor</b>               | <b>No</b>                   |           | 393       | 25               | 1                 | -                 |                   |
|                                             |                                     | <b>Yes</b>                  |           | 2370      | 308              | 1.877             | (1.246 to 2.827)  | <b>0.0026</b>     |
|                                             | <b>Hypertension</b>                 | <b>No</b>                   |           | 2048      | 225              | 1                 | -                 |                   |
|                                             |                                     | <b>Yes</b>                  |           | 661       | 102              | 1.712             | (1.351 to 2.168)  | <b>&lt;0.0001</b> |
|                                             | <b>Diabetes mellitus</b>            | <b>No</b>                   |           | 2462      | 292              | 1                 | -                 |                   |
|                                             |                                     | <b>Yes</b>                  |           | 142       | 22               | 1.583             | (1.025 to 2.446)  | <b>0.0382</b>     |
|                                             | <b>Creatinine</b>                   | <b>&lt; 1.5 mg/dL</b>       |           | 2466      | 291              | 1                 | -                 |                   |
| <b>≥ 1.5 mg/dL</b>                          |                                     | 270                         | 40        | 0.977     | (0.554 to 1.724) | 0.9358            |                   |                   |
| <b>ECD</b>                                  | <b>No</b>                           |                             | 1947      | 187       | 1                | -                 |                   |                   |
|                                             | <b>Yes</b>                          |                             | 916       | 146       | 1.950            | (1.565 to 2.429)  | <b>&lt;0.0001</b> |                   |
| <b>Baseline transplant characteristics</b>  | <b>Graft Rank</b>                   | <b>1</b>                    | 2350      | 249       | 1                | -                 |                   |                   |
|                                             |                                     | <b>&gt; 1</b>               | 413       | 84        | 2.233            | (1.736 to 2.873)  | <b>&lt;0.0001</b> |                   |
|                                             | <b>Cold ischemia time</b>           | <b>&lt; 12 hours</b>        |           | 674       | 44               | 1                 | -                 |                   |
|                                             |                                     | <b>12-24 hours</b>          |           | 1560      | 203              | 1.885             | (1.358 to 2.616)  |                   |
| <b>≥ 24 hours</b>                           |                                     | 519                         | 85        | 2.495     | (1.729 to 3.601) | <b>&lt;0.0001</b> |                   |                   |
| <b>Baseline Immunologic characteristics</b> | <b>No. of HLA A/B/DR mismatches</b> |                             | 2700      | 326       | 1.076            | (0.993 to 1.165)  | 0.0723            |                   |
|                                             | <b>Anti-HLA DSA on day 0</b>        | <b>No</b>                   | 2428      | 249       | 1                | -                 |                   |                   |
|                                             |                                     | <b>Yes</b>                  | 335       | 84        | 4.086            | (3.141 to 5.315)  | <b>&lt;0.0001</b> |                   |

Abbreviations: CI, Confidence interval; HR, Hazard ratio; ECD, Expanded criteria donor; DSA, Donor-specific anti-HLA antibodies; CV, Cardio-vascular; HLA, human leucocyte antigen

**Web Table 5B: Factors associated with kidney allograft loss stratified by centre in multivariate analysis.**

|                                     |                      | Number of patients | Number of events | HR    | 95% CI           | P                 |
|-------------------------------------|----------------------|--------------------|------------------|-------|------------------|-------------------|
| <b>ECD</b>                          | <b>No</b>            | 1835               | 187              | 1     | -                |                   |
|                                     | <b>Yes</b>           | 855                | 138              | 1.914 | (1.524 to 2.404) | <b>&lt;0.0001</b> |
| <b>Cold ischemia time</b>           | <b>&lt; 12 hours</b> | 670                | 44               | 1     | -                |                   |
|                                     | <b>12-24 hours</b>   | 1514               | 198              | 1.437 | (1.028 to 2.009) |                   |
|                                     | <b>≥ 24 hours</b>    | 506                | 83               | 1.763 | (1.209 to 2.572) | <b>0.0131</b>     |
| <b>Graft Rank</b>                   | <b>1</b>             | 2278               | 241              | 1     | -                |                   |
|                                     | <b>&gt; 1</b>        | 412                | 84               | 1.508 | (1.132 to 2.008) | <b>0.0050</b>     |
| <b>No. of HLA A/B/DR mismatches</b> |                      | 2690               | 325              | 1.100 | (1.015 to 1.199) | <b>0.0207</b>     |
| <b>Anti-HLA DSA on day 0</b>        | <b>No</b>            | 2364               | 241              | 1     | -                |                   |
|                                     | <b>Yes</b>           | 326                | 84               | 3.594 | (2.679 to 4.820) | <b>&lt;0.0001</b> |

Final multivariate Cox model obtained by entering risk factors from the univariate model reaching  $p \leq 0.10$  as the threshold in a single multivariate proportional hazards model. The final multivariate model is adjusted on the following parameters: Deceased donor, Donor diabetes, ECD, graft rank, cold ischemia time, the number of HLA A/B/DR mismatch and circulating donor-specific antibodies.

Abbreviations: CI, Confidence interval; HR, Hazard ratio; ECD, Expanded criteria donor; HLA: human leucocyte antigen; DSA, donor-specific anti-HLA antibodies

**Web Table 6: Baseline characteristics of donors and recipients in the external validation cohort and in the principal cohort.**

|                                               | External validation Cohort<br>(n=4128) |                        | Development cohort<br>(n=2763) |                        | P <sup>a</sup> |
|-----------------------------------------------|----------------------------------------|------------------------|--------------------------------|------------------------|----------------|
|                                               | n                                      |                        | n                              |                        |                |
| <b>Recipient characteristics</b>              |                                        |                        |                                |                        |                |
| Age, mean (SD), y                             | 4128                                   | 49.36 (13.6)           | 2763                           | 49.23 (13.5)           | 0.6913         |
| Gender male, No. (%)                          | 4128                                   | 2548 (61.72)           | 2763                           | 1643 (59.46)           | 0.0600         |
| ESRD causes                                   | 4128                                   |                        | 2763                           |                        |                |
| Glomerulonephritis, No. (%)                   |                                        | 1101 (26.67)           |                                | 767 (27.76)            |                |
| Diabetes, No. (%)                             |                                        | 622 (15.07)            |                                | 264 (9.56)             |                |
| Hypertension, No. (%)                         |                                        | 237 (5.74)             |                                | 212 (7.67)             |                |
| Other, No. (%)                                |                                        | 2168 (52.52)           |                                | 1520 (55.01)           | <0.0001        |
| Time since onset dialysis, mean (SD), y       | 4128                                   | 2.79 (3.44)            | 2763                           | 3.90 (4.41)            | <0.0001        |
| <b>Donor characteristics</b>                  |                                        |                        |                                |                        |                |
| Age, mean (SD), y                             | 4127                                   | 48.16 (16.05)          | 2763                           | 50.31 (15.98)          | <0.0001        |
| Donor age categories, No. (%), y              | 4127                                   |                        | 2763                           |                        |                |
| 0-49                                          |                                        | 2043 (49.50)           |                                | 1222 (44.23)           |                |
| 50-59                                         |                                        | 1005 (24.35)           |                                | 733 (26.53)            |                |
| >60                                           |                                        | 1079 (26.15)           |                                | 808 (29.24)            | <0.0001        |
| Gender male, No. (%)                          | 4128                                   | 2457 (59.52)           | 2763                           | 1509 (54.61)           | <0.0001        |
| Hypertension, No. (%)                         | 3414                                   | 802 (23.49)            | 2709                           | 661 (24.40)            | 0.4080         |
| Diabetes mellitus, No. (%)                    | 2271                                   | 47 (2.07)              | 2604                           | 142 (5.45)             | <0.0001        |
| Creatinine > 1.5 mg/dL, No. (%)               | 4008                                   | 495 (12.35)            | 2736                           | 270 (9.87)             | <0.0001        |
| Donor type                                    |                                        |                        |                                |                        |                |
| Deceased donors, No. (%)                      | 4128                                   | 3755 (90.96)           | 2763                           | 2370 (85.78)           | <0.0001        |
| Death of cerebro-vascular disease, No. (%)    | 3755                                   | 1963 (52.28)           | 2370                           | 1323 (55.82)           | 0.0070         |
| ECD, No. (%)                                  | 4015                                   | 1245 (31.01)           | 2763                           | 916 (33.15)            | 0.0630         |
| ECD/death donors, No. (%)                     | 3646                                   | 1245 (34.15)           | 2370                           | 916 (38.65)            | <0.0001        |
| <b>Transplant baseline characteristics</b>    |                                        |                        |                                |                        |                |
| Graft rank > 1, No. (%)                       | 4128                                   | 611 (14.80)            | 2763                           | 413 (14.95)            | 0.8670         |
| Cold ischemia time, No. (%)                   | 4126                                   |                        | 2753                           |                        |                |
| < 12 hours                                    |                                        | 803 (19.46)            |                                | 674 (24.48)            |                |
| [12-24[ hours                                 |                                        | 2319 (56.21)           |                                | 1560 (56.67)           |                |
| ≥ 24 hours                                    |                                        | 1004 (24.33)           |                                | 519 (18.85)            | <0.0001        |
| HLA A/B/DR mismatch, mean (SD), number        | 4128                                   | 3.30 (1.37)            | 2700                           | 3.12 (1.43)            | <0.0001        |
| Delayed graft function <sup>b</sup> , No. (%) | 4009                                   | 1151 (28.71)           | 2603                           | 707 (27.16)            | 0.1710         |
| Follow up (years), median, 95%[IC]            | 4128                                   | 6.08<br>(5.95 to 6.23) | 2763                           | 5.54<br>(5.42 to 5.68) | <0.0001        |
| Death events, No. (%)                         | 4128                                   | 366 (8.87)             | 2763                           | 263 (9.52)             | 0.3570         |
| Graft lost, No. (%)                           | 4128                                   | 595 (14.41)            | 2763                           | 333 (12.05)            | 0.0050         |

Abbreviations: ECD, expanded criteria donor, ESRD, end-stage renal disease, HLA, human leucocyte antigen, IC, confidence interval

<sup>a</sup>  $\chi^2$  tests for comparison of proportions and unpaired test for comparison of continuous variables.

<sup>b</sup> Delayed graft function was defined by the use of dialysis in the first postoperative week.

**Web Table 7: Factors associated with kidney allograft loss in the external validation cohort in multivariate analysis.**

|                                     |                      | Number of patients | Number of events | HR    | 95% CI           | P                 |
|-------------------------------------|----------------------|--------------------|------------------|-------|------------------|-------------------|
| <b>ECD</b>                          | <b>No</b>            | 2375               | 290              | 1     | -                |                   |
|                                     | <b>Yes</b>           | 1235               | 235              | 1.692 | (1.418 to 2.020) | <b>&lt;0.0001</b> |
| <b>Cold ischemia time</b>           | <b>&lt; 12 hours</b> | 694                | 57               | 1     | -                |                   |
|                                     | <b>12-24 hours</b>   | 2006               | 303              | 1.442 | (1.078 to 1.928) |                   |
|                                     | <b>≥ 24 hours</b>    | 910                | 165              | 1.687 | (1.244 to 2.287) | <b>0.0033</b>     |
| <b>Graft Rank</b>                   | <b>1</b>             | 3030               | 414              | 1     | -                |                   |
|                                     | <b>&gt; 1</b>        | 580                | 111              | 1.251 | (0.964 to 1.624) | <b>0.0920</b>     |
| <b>No. of HLA A/B/DR mismatches</b> |                      | 3610               | 525              | 1.074 | (1.004 to 1.149) | <b>0.0370</b>     |
| <b>Anti-HLA antibodies on day 0</b> | <b>PRA &lt; 5%</b>   | 2724               | 364              | 1     | -                |                   |
|                                     | <b>PRA ≥ 5%</b>      | 886                | 161              | 1.380 | (1.099 to 1.731) | <b>0.0060</b>     |

Abbreviations: CI, Confidence interval; HR, Hazard ratio; ECD, Expanded criteria donor.; HLA, human leucocyte antigen, PRA, panel reactive antibody

Web Figure 1: Distribution of donor age in the development cohort. (N=2763)

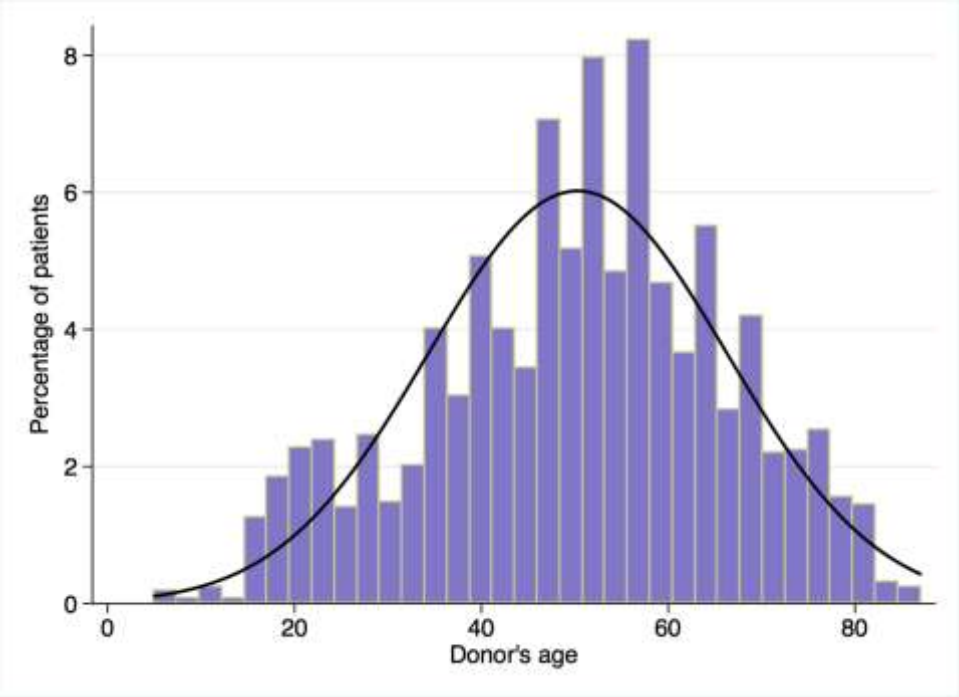

**Web Figure 2: Kidney allograft preimplantation biopsy phenotypes, according to SCD or ECD status and the presence of donor specific anti-HLA antibody on the day of transplantation.\***

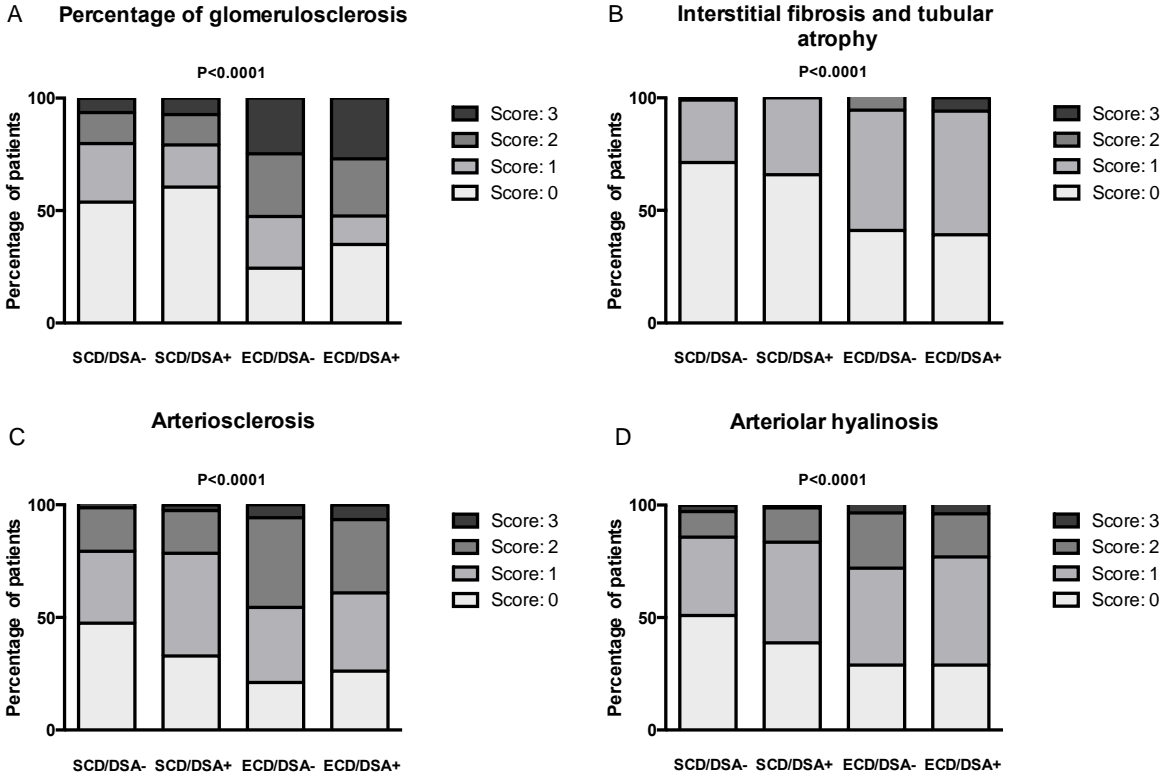

Abbreviations: SCD, Standard criteria donor; ECD, Expanded criteria donor; DSA, Donor specific anti-HLA antibodies

\* Biopsy analysis performed in 1011 patients with available and adequate preimplantation biopsy on the day of transplantation.

Web Figure 3A. Cumulative incidence plots of graft loss comparing ECD (black curves) and SCD (red curves) and those of deaths (the competing event for graft loss) comparing ECD (green curves) and SCD (blue curves)

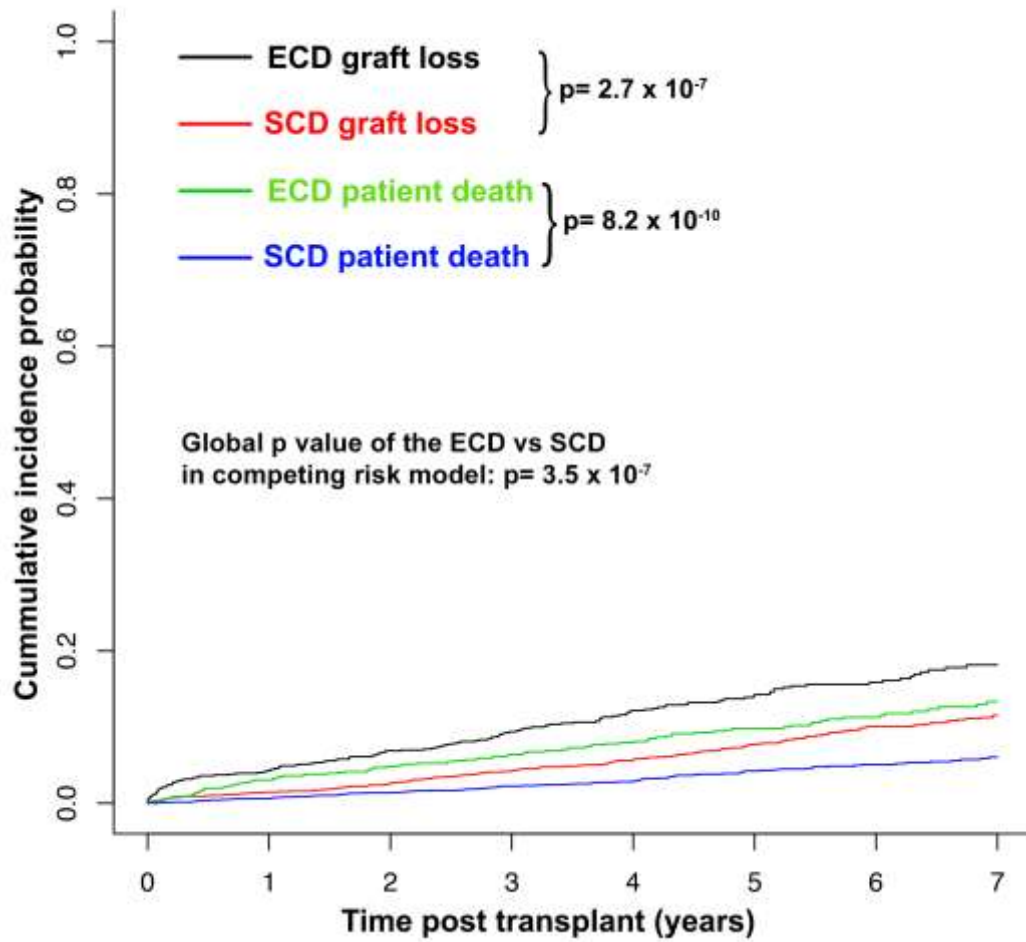

Abbreviations: SCD, Standard criteria donor; ECD, Expanded criteria donor;



Web Figure 3B. Cumulative incidence plots of graft loss comparing ECD/DSA+ (black curves) and SCD/DSA+ (red curves) and those of deaths (the competing event for graft loss) comparing ECD/DSA+ (green curves) and SCD/DSA+ (blue curves)

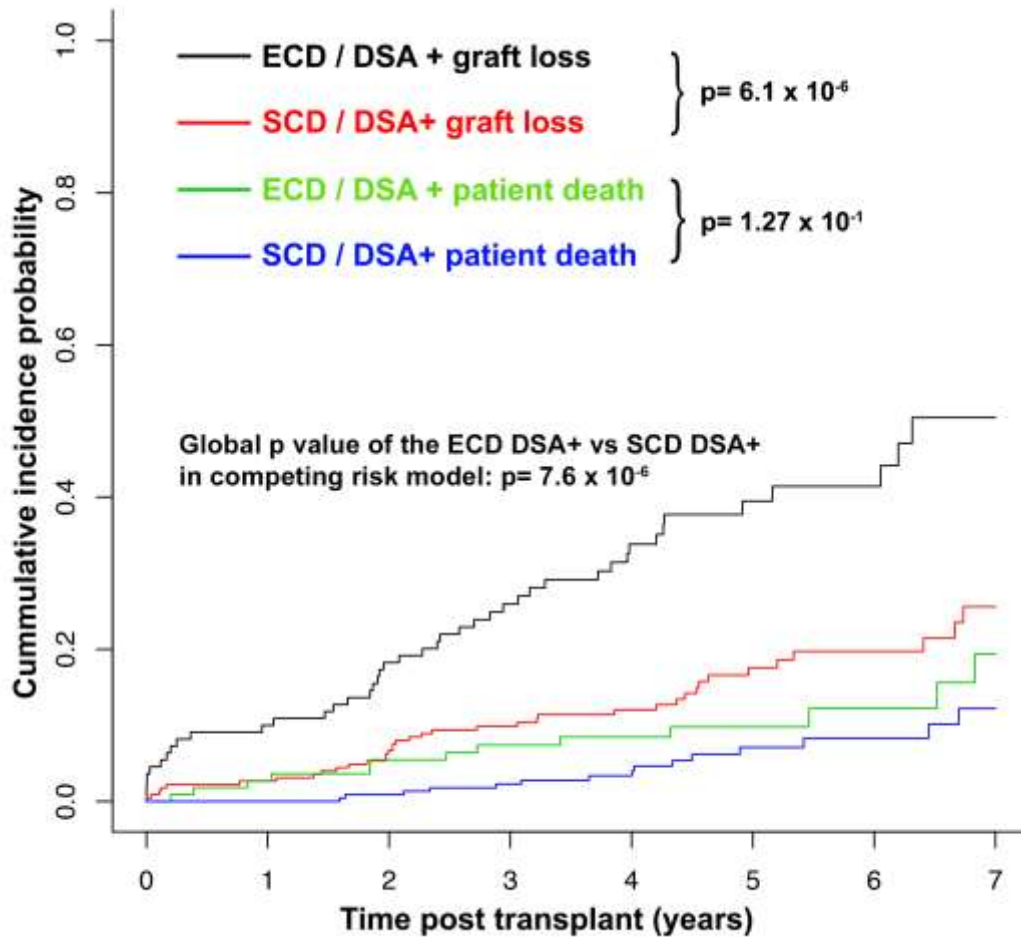

Abbreviations: SCD, Standard criteria donor; ECD, Expanded criteria donor; DSA, Donor specific anti-HLA antibodies

**Web Figure 4: Kidney allograft function at one year post-transplantation, according to SCD or ECD status and the presence of donor specific anti-HLA antibody on the day of transplantation.**

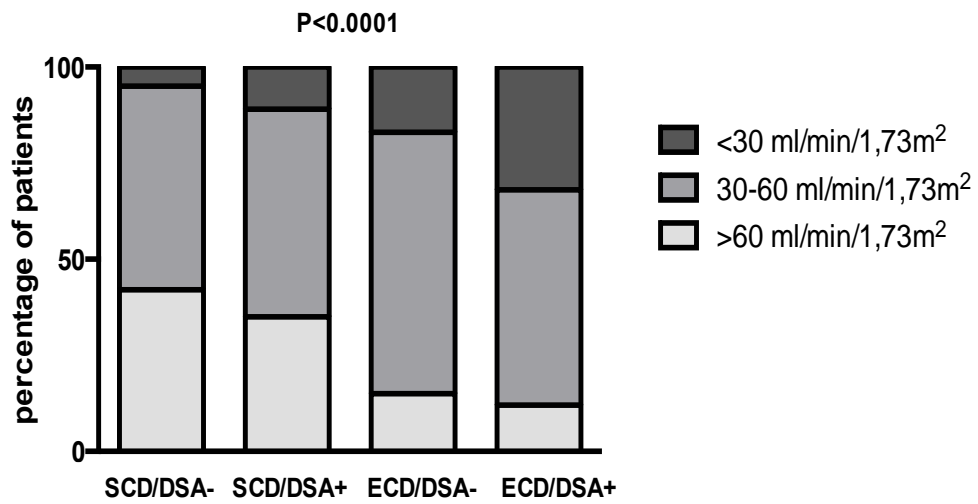

Abbreviations: SCD, Standard criteria donor; ECD, Expanded criteria donor; DSA, Donor specific anti-HLA antibodies

**Web Figure 5: Kidney allograft biopsy phenotypes at one year post-transplantation, according to SCD or ECD status and donor specific anti-HLA antibody on the day of transplantation.\***

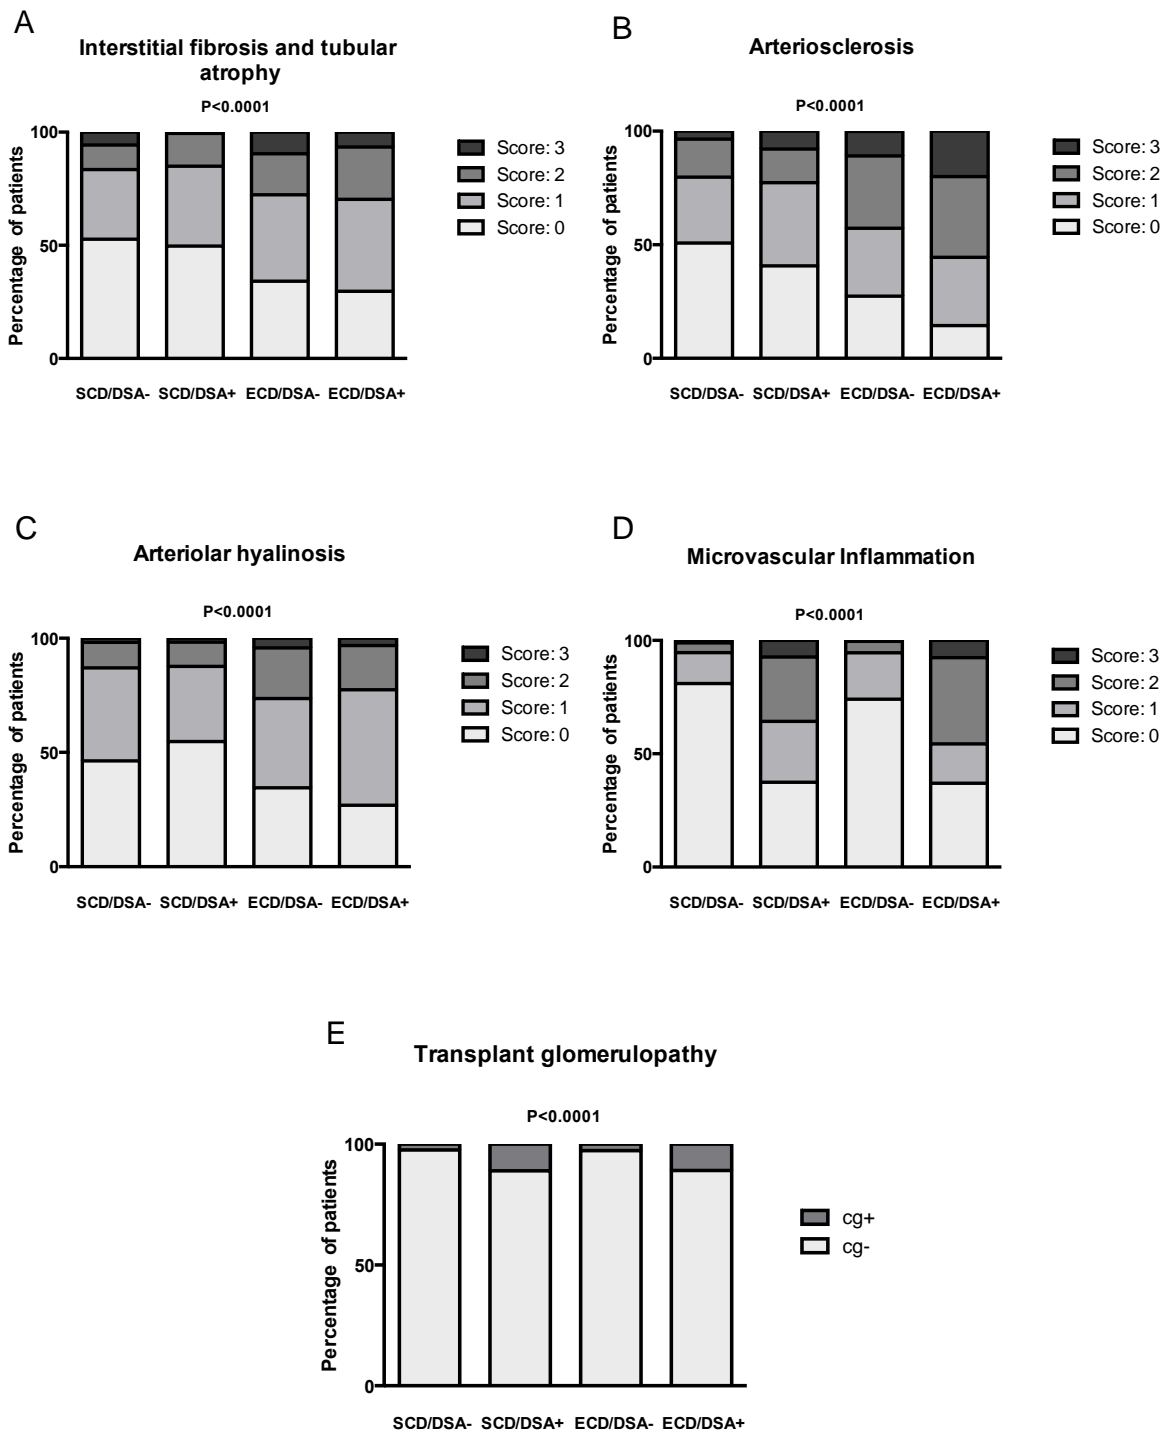

Abbreviations: SCD, Standard criteria donor; ECD, Expanded criteria donor; DSA, Donor specific anti-HLA antibodies

\* Biopsy analysis performed in 1743 patients with available and adequate biopsy at one year post-transplantation.

**Web Figure 6. Kaplan-Meier curves for kidney allograft survival by donor type (SCD, Panel A; ECD, Panel B) and anti-HLA DSA MFI level on the time of transplantation.**

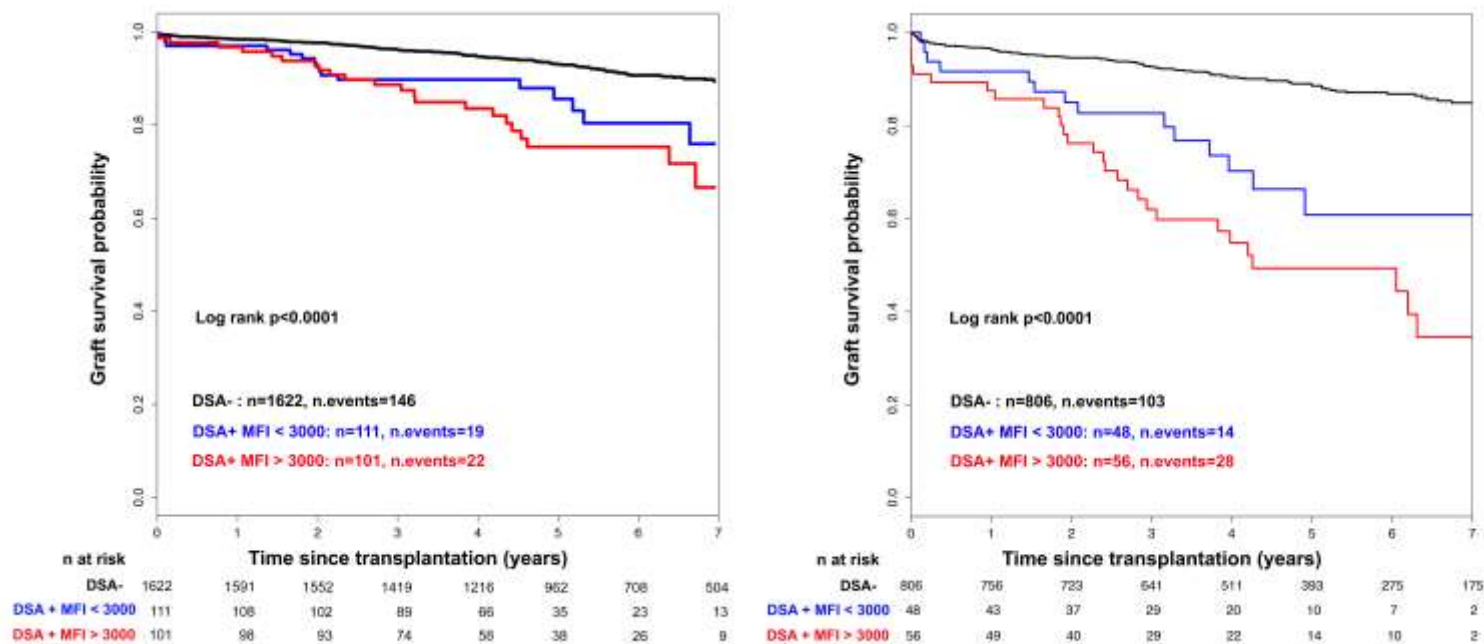

Abbreviations: ECD, Expanded criteria donor; DSA, Donor specific antibodies; MFI, Mean fluorescence intensity

**Web Figure 7: Kaplan-Meier curves for kidney allograft survival by HLA Class of immunodominant DSA.**

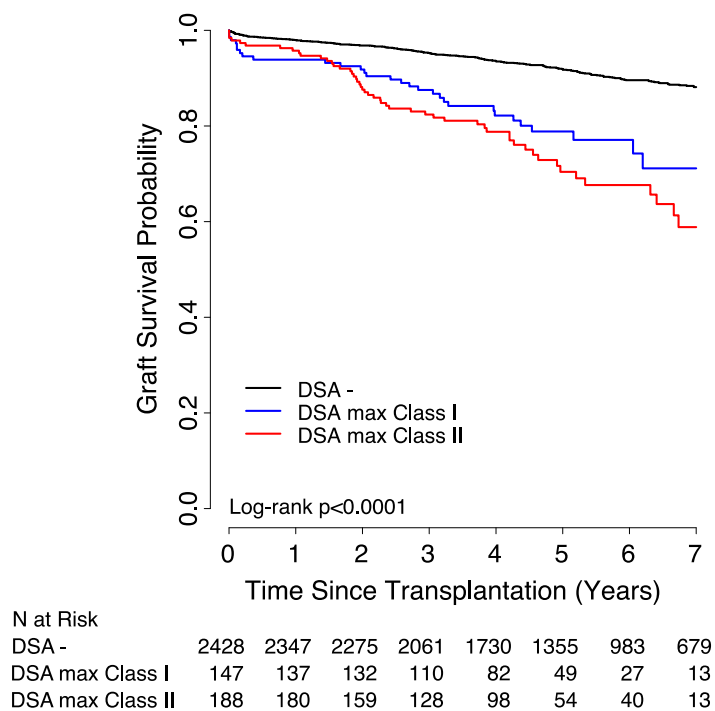

Abbreviations: DSA, Donor specific anti-HLA antibodies

**Web Figure 8. Kaplan-Meier curves for kidney allograft survival by KDRI (Panel A) and the presence of DSA on the day of transplantation (Panel B).**

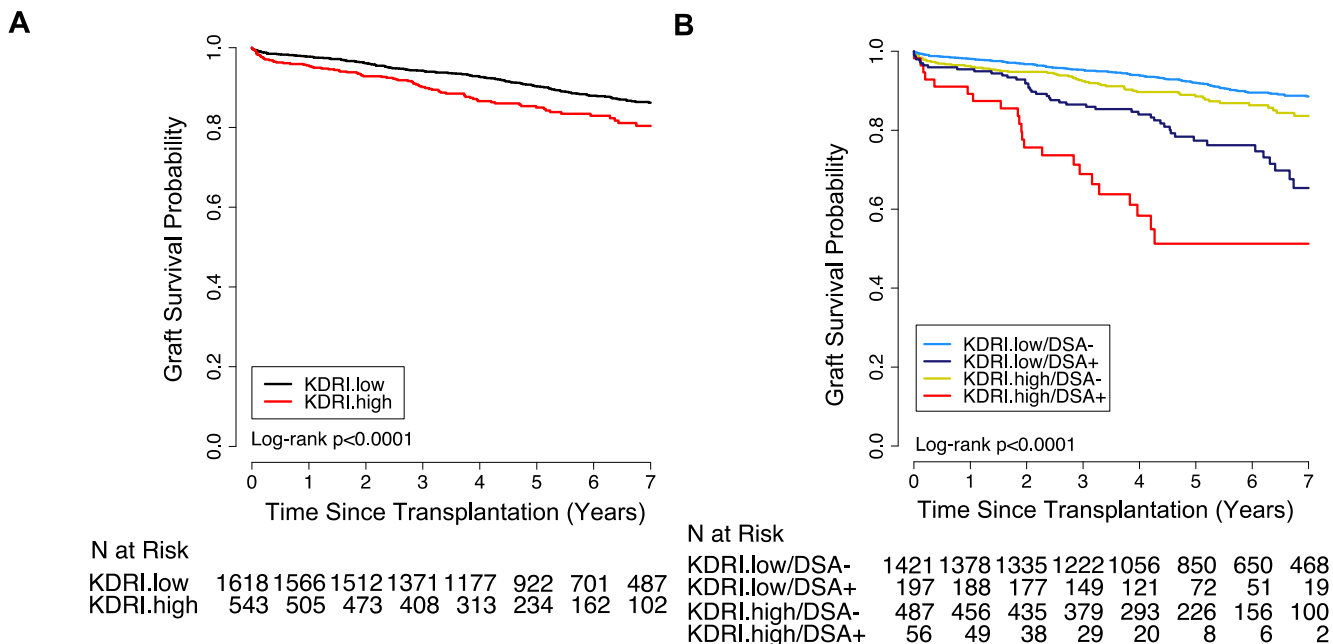

Abbreviations: KDRI, Kidney donor risk index; DSA, Donor specific anti-HLA antibodies

**Web Figure 9: Kidney allograft survival according to ECD and DSA status in the propensity score matched cohort.**

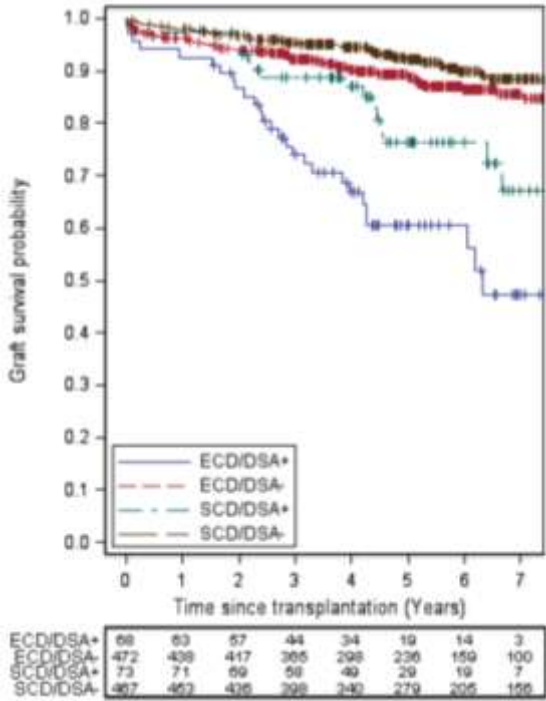

Abbreviations: SCD, Standard criteria donor; ECD, Expanded criteria donor; DSA, Donor specific anti-HLA antibodies

**Web Figure 10: Kaplan-Meier curves for kidney allograft survival in the external validation cohort by donor type and anti-HLA antibody sensitization (Panel reactive antibodies, PRA).**

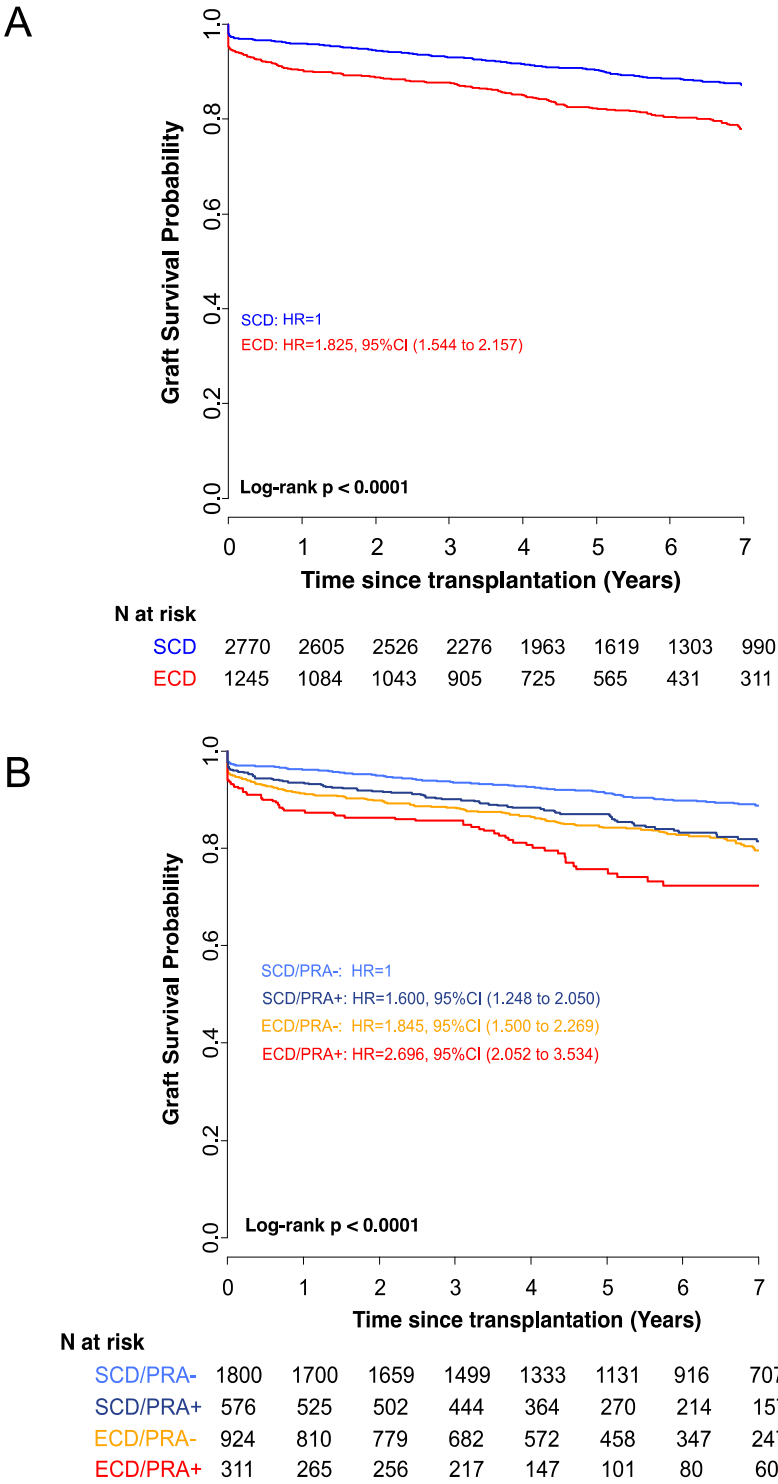

Panel A shows the classic approach to determine kidney allograft survival based on the donor SCD or ECD status. Panel B integrates ECD or SCD status with the presence or absence of anti-HLA antibodies on the day of transplantation.  
 Abbreviations: SCD, Standard criteria donor; ECD, Expanded criteria donor; PRA+, Panel reactive anti-HLA antibodies >5%.
